# Supplementary material
Source: PubMed Central journal article supplement (PMC2859274)
Supplement: 10.3163.1536-5050.98.2.008-sg001.pdf [file 10.3163.1536-5050.98.2.008-sg001.pdf]

**Personal digital assistant usage among undergraduate medical students: exploring trends, barriers,  
and the advent of smartphones**

**Trish Chatterley, MLIS; Dagmara Chojecki, MLIS**

**APPENDIX A**

**Survey questions**

1. What year of your undergraduate medical education are you in?
  - 1st
  - 2nd
  - 3rd
  - 4th
2. What device(s) do you currently own?
  - I don't own a handheld electronic information device/personal digital assistant (PDA).
  - Palm OS
  - Palm Z 22
  - Palm T/X
  - Palm Tungsten E2
  - Palm LifeDrive
  - Other: please name \_\_\_\_\_
  - Microsoft Pocket PC
  - Dell Axim X51v
  - HP iPAQ hx1955
  - HP iPAQ hx2495
  - Asus MyPal A632
  - Other: please name \_\_\_\_\_
  - BlackBerry
  - Blackberry Pearl
  - BlackBerry Curve
  - BlackBerry 8800 series
  - BlackBerry 8700 series
  - Other: please name \_\_\_\_\_
  - Integrated PDA/phone
  - O2 Xda Mini Pro
  - Samsung SCH1730
  - PalmTreo 650
  - PalmTreo 700w
  - Other: please name \_\_\_\_\_
  - Other type of device: please name \_\_\_\_\_

3. If you could have any device you wanted, which would you choose?
- Palm OS
  - Palm Z 22
  - Palm T/X
  - Palm Tungsten E2
  - Palm LifeDrive
  - Other: please name \_\_\_\_\_
  - Microsoft Pocket PC
  - Dell Axim X51v
  - HP iPAQ hx1955
  - HP iPAQ hx2495
  - Asus MyPal A632
  - Other: please name \_\_\_\_\_
  - BlackBerry
  - Blackberry Pearl
  - BlackBerry Curve
  - BlackBerry 8800 series
  - BlackBerry 8700 series
  - Other: please name \_\_\_\_\_
  - Integrated PDA/phone
  - O2 Xda Mini Pro
  - Samsung SCH1730
  - PalmTreo 650
  - PalmTreo 700w
  - Other: please name \_\_\_\_\_
  - Other type of device: please name \_\_\_\_\_
4. How did you learn to use your PDA? (check all that apply)
- Peers
  - PDA manual
  - Internet guide
  - Departmental training
  - Library training
  - Taught myself
  - I am still trying to figure my PDA out
  - Other: please name \_\_\_\_\_
5. What programs/applications have you downloaded to your PDA? (check all that apply)
- PEPID
  - Access Medicine
  - Harrison's Manual of Medicine
  - Merck Manual
  - Epocrates Rx
  - ACP Pier
  - Archimedes
  - EBM calculator
  - MedCalc

- InfoRetriever
- AvantGo
- MEDLINE on Tap
- Other: please name \_\_\_\_\_
- 6. How much money have you spent on programs/applications for your PDA?
  - Nothing. I use only free applications.
  - \$1–50
  - \$50–100
  - \$100 or more
- 7. Which of the programs/applications that you have do you find most useful?  
Please name your top three: \_\_\_\_\_
- 8. How often do you use your PDA?
  - Once a day or more?
  - 2–3 times a week?
  - Once a week?
  - Once a month?
  - Rarely (less than once a month)
- 9. Please indicate the ways in which you use your PDA (check all that apply)
  - Access email, Internet, or text messages
  - Calendar, addresses, or task management
  - Access rotation/course information (handouts, evaluations, schedules)
  - Take notes, do homework, perform other academic tasks
  - Access a drug reference (ex., Pepid)
  - Perform clinical calculations
  - Access a clinical reference or e-textbook
  - Access dictionaries
  - Access medical literature, abstracts, or guidelines. If you do please answer the questions below.
- 9.a. Have you searched Ovid MEDLINE or PubMed via PDA?
  - Yes
  - No
- 9.b. How often are your searches successful? (i.e., Do you find the answer you are looking for:)
  - Always
  - Sometimes
  - Rarely
  - Never
- Translate a foreign language (e.g., medical French)
- Record audio, video, or still pictures
- Access a different diagnosis or treatment plan
- Enter SOAP notes
- Patient data or patient orders
- Track patients, access lab results or patient information

10. What type of training would be beneficial to you with regard to PDAs? (check all that apply)
- Initial training in the basic functions of PDAs (choosing the right model, downloading resources, beaming, hot synching, etc.)
  - Use of general resources for PDAs (word processing, spreadsheets, address book, calendar)
  - Use of health sciences resources for PDAs (Harrison's, PDR, Patient Tracker, drug resources)
  - Other: please name \_\_\_\_\_
11. In what format would you prefer instruction?
- Group lecture-style sessions led by an instructor
  - Online tutorials
  - Hands-on, interactive small group sessions
  - Other: \_\_\_\_\_
12. What library-provided programs and services for your PDA would you find useful?
- Accessing the library catalogue
  - Accessing online databases
  - Asking the librarian questions via your PDA
  - Name other resources or services you would like to have: \_\_\_\_\_
13. Are you satisfied with library support for PDAs?
- Yes
  - No
14. Do you believe all medical students should be required to own a PDA?
- Yes
  - No
15. Do you believe use of a PDA in the 1st and 2nd years of the MD program is important preparation for clinical years?
- Yes
  - No
16. Have any of your instructors encouraged you to purchase/use a PDA?
- Yes
  - No
17. Have you seen any of your instructors using PDAs or other handheld devices?
- Yes
  - No
18. Please share any other comments you may have about handheld devices or resources.
19. If you would be willing to participate in a focus group discussion with other medical students on this topic, please leave your contact information below so that we may get in touch with you to make the appropriate arrangements.
